# Supplementary material
Source: publisher figshare collection journal article supplement (https://gsapubs.figshare.com/ndownloader/files/33608309)
Supplement: Supplementary file 1 [file 33608309]

## Sheet: Table A1
Supplemental Material 1.
TABLE S1. WHOLE ROCK MAJOR (WT.%) AND TRACE ELEMENT (PPM) ANALYSES OF NEALTICAN LAVA AND AND LORENZO PUMICE ROCK SAMPLES FROM POPOCATÉPETL VOLCANO.
Volcano				Popocatépetl	Popocatépetl	Popocatépetl	Popocatépetl	Popocatépetl	Popocatépetl	Popocatépetl	Popocatépetl	Popocatépetl	Popocatépetl	Popocatépetl	Popocatépetl	Popocatépetl	Popocatépetl	Popocatépetl	Popocatépetl	Popocatépetl	Popocatépetl	Popocatépetl	Popocatépetl	Popocatépetl	Popocatépetl	Popocatépetl	Popocatépetl	Popocatépetl	Popocatépetl	Popocatépetl	Popocatépetl	Popocatépetl	Popocatépetl	Popocatépetl	Popocatépetl	Popocatépetl	Popocatépetl	Popocatépetl	Popocatépetl	Popocatépetl	Popocatépetl	Popocatépetl	Popocatépetl	Popocatépetl	Popocatépetl
Sample				PO51	PO48	PO06B	PO41	PO08	PO25	PO44	PO06A	PO55B	PO54	PO10	PO04	PO05	PO50	PO56	PO01	PO11	PO09	PO07	PO28	PO13	PO46	PO45	PO32	PO21	PO16	PO19	PO17	PO22	PO14	PO24	PO18	PO40-LP-B	PO40-LP-A	PO40-LP-C	PO40-LP-F	PO40-LP-E	PO40-LP-D	PO40-LP-I	PO40-LP-H	PO40-LP-G	PO40-LP-J
Rock type				Andesite	Andesite	Andesite	Andesite	Andesite	Andesite	Andesite	Andesite	Andesite	Andesite	Andesite	Andesite	Andesite	Andesite	Andesite	Andesite	Andesite	Andesite	Andesite	Andesite	Andesite	Andesite	Andesite	Andesite	Dacite	Dacite	Dacite	Dacite	Dacite	Dacite	Dacite	Dacite	Pumice	Pumice	Pumice	Pumice	Pumice	Pumice	Pumice	Pumice	Pumice	Pumice
				Unit F1	Unit F1	Unit F2	Unit F1	Unit F2	Unit F1	Unit F2	Unit F2	Unit F2	Unit F2	Unit F1	Unit F2	Unit F2	Unit F2	Unit F2	Unit F2	Unit F1	Unit F1	Unit F2	Unit F3	Unit F2	Unit F3	Unit F3	Unit F3	Unit F4	Unit F4	Unit F4	Unit F4	Unit F4	Unit F4	Unit F4	Unit F4	Lorenzo pumice	Lorenzo pumice	Lorenzo pumice	Lorenzo pumice	Lorenzo pumice	Lorenzo pumice	Lorenzo pumice	Lorenzo pumice	Lorenzo pumice	Lorenzo pumice
Latitude (N)				19° 00' 50.2''	19° 02' 58.1''	19° 00' 26.6''	19° 02' 43.0''	19° 00' 25.6''	19° 01' 38.6''	19° 02' 22.3''	19° 00' 26.6''	19° 03' 08.1''	19° 01' 04.1''	18° 58' 20.6''	19° 00' 50.0''	19° 01' 41.4''	19° 01' 05.2''	19° 02' 48.9''	19° 02' 47.4''	18° 59' 17.5''	18° 59' 23.3''	19° 00' 29.1''	19° 02' 10.1''	19° 00' 39.5''	19° 05' 55.2''	19° 02' 49.9''	19° 03' 39.2''	19° 03' 43.8''	19° 03' 42.1''	19° 04' 29.0''	19° 03' 42.0''	19° 03' 28.7''	19° 03' 45.4''	19° 03' 13.9''	19° 03' 47.2''	19° 02' 25.9''	19° 02' 25.9''	19° 02' 25.9''	19° 02' 25.9''	19° 02' 25.9''	19° 02' 25.9''	19° 02' 25.9''	19° 02' 25.9''	19° 02' 25.9''	19° 02' 25.9''
Longitude (W)				98° 28' 32.1''	98° 34' 15.8''	98° 25' 34.8''	98° 32' 51.8''	98° 26' 41.9''	98° 30' 08.1''	98° 28' 20.1''	98° 25' 34.8''	98° 30' 45.9''	98° 25' 29.7''	98° 28' 10.1''	98° 25' 26.9''	98° 25' 24.2''	98° 26' 58.6''	98° 29' 42.0''	98° 26' 18.2''	98° 27' 11.3''	98° 28' 56.3''	98° 26' 00.7''	98° 29' 45.7''	98° 29' 02.4''	98° 34' 46.1''	98° 35' 04.0''	98° 34' 15.3''	98° 32' 12.5''	98° 30' 47.2''	98° 32' 21.3''	98° 31' 43.5''	98° 31' 51.4''	98° 30' 45.5''	98° 31' 46.1''	98° 28' 50.1''	98° 33' 48.4''	98° 33' 48.4''	98° 33' 48.4''	98° 33' 48.4''	98° 33' 48.4''	98° 33' 48.4''	98° 33' 48.4''	98° 33' 48.4''	98° 33' 48.4''	98° 33' 48.4''
Altitude asl (m)				2295	3175	2176	2943	2216	2528	2406	2176	2683	2225	2215	2195	2199	2346	2534	2247	2151	2209	2203	2476	2333	3392	3560	3052	2813	2668	2774	2757	2791	2610	2801	2445	3085	3085	3085	3085	3085	3085	3085	3085	3085	3085
	Unit Symbol	Detection Limit	Analytical Method
SiO2	%	0.01	FUS-ICP	60.83	61.11	61.22	61.38	61.4	61.43	61.44	61.48	61.53	61.53	61.64	61.76	61.83	61.87	61.931	62	62.02	62.06	62.22	62.54	62.69	62.76	62.77	62.83	63.26	63.76	64.06	64.21	64.25	64.32	64.32	64.56	60.8	61.25	61.35	61.51	62.22	62.32	62.66	62.94	63.29	63.56
Al2O3	%	0.01	FUS-ICP	16.35	16.69	15.65	16.51	15.87	15.54	16.64	15.92	16.33	16.32	16.28	16.11	16.12	17	16.2699	15.55	15.8	15.99	15.92	16.25	15.99	16.51	16.89	16.87	16.42	16.27	16.23	16.31	16.37	16.38	16.22	16.11	16.61	16.61	16.42	16.58	17.03	16.87	16.22	16.18	16.45	16
Fe2O3(T)	%	0.01	FUS-ICP	5.57	5.71	5.74	5.93	5.68	5.76	5.7	5.84	5.58	5.92	5.83	5.91	5.79	5.62	5.12	5.58	5.49	5.73	5.76	5.42	5.58	5.43	5.53	5.57	5.12	5.29	5.4	5.3	5.37	5.23	5.24	5.15	5.46	5.36	5.44	5.44	5.46	5.59	5.55	5.52	5.58	5.55
MnO	%	0.001	FUS-ICP	0.09	0.092	0.099	0.098	0.096	0.109	0.093	0.099	0.092	0.097	0.096	0.1	0.096	0.092	0.0929511	0.093	0.093	0.097	0.098	0.099	0.095	0.093	0.095	0.096	0.087	0.089	0.095	0.09	0.094	0.092	0.091	0.09	0.093	0.092	0.093	0.094	0.094	0.093	0.093	0.094	0.094	0.095
MgO	%	0.01	FUS-ICP	3.6	3.62	3.89	3.78	3.81	3.54	3.58	3.8	3.72	3.84	3.82	4.11	3.87	3.42	3.82914	3.88	3.78	3.81	4.08	2.72	3.85	2.8	2.85	2.96	2.8	2.7	2.78	2.82	2.79	2.77	2.74	2.72	3.07	3.06	3.08	3.07	3.09	3.05	3.03	3.06	3.06	3.19
CaO	%	0.01	FUS-ICP	5.23	5.2	5.41	5.25	5.45	5.11	5.28	5.42	5.25	5.41	5.37	5.52	5.4	5.28	5.20495	5.5	5.3	5.39	5.59	4.87	5.31	4.93	5.02	5.13	4.93	4.84	5.02	4.91	5.06	4.95	4.96	4.96	5.25	5.26	5.2	5.18	5.19	5.07	5.33	5.33	5.37	5.41
Na2O	%	0.01	FUS-ICP	4.14	4.25	4.29	4.26	4.26	3.92	4.13	4.3	4.14	4.18	4.25	4.26	4.27	4.21	4.07878	4.27	4.12	4.26	4.32	4.01	4.14	4.09	4.11	4.13	4.21	4.17	4.2	4.18	4.17	4.13	4.17	4.1	4.04	3.95	3.97	3.99	4.07	4.2	3.81	3.84	3.87	3.85
K2O	%	0.01	FUS-ICP	1.81	1.87	1.75	1.86	1.66	1.81	1.78	1.76	1.78	1.77	1.68	1.65	1.66	1.81	1.72111	1.67	1.63	1.69	1.66	1.82	1.68	1.81	1.78	1.77	1.71	1.77	1.67	1.77	1.67	1.72	1.72	1.7	1.63	1.61	1.64	1.66	1.71	1.64	1.51	1.53	1.54	1.53
TiO2	%	0.001	FUS-ICP	0.836	0.891	0.877	0.951	0.875	0.903	0.838	0.889	0.849	0.936	0.921	0.902	0.888	0.849	0.848351	0.868	0.816	0.89	0.896	0.767	0.818	0.795	0.82	0.794	0.722	0.75	0.767	0.747	0.78	0.77	0.76	0.738	0.778	0.772	0.777	0.787	0.806	0.785	0.754	0.756	0.766	0.753
P2O5	%	0.01	FUS-ICP	0.2	0.23	0.24	0.24	0.22	0.23	0.22	0.25	0.19	0.23	0.23	0.2	0.22	0.19	0.182883	0.21	0.2	0.22	0.23	0.18	0.21	0.17	0.19	0.18	0.17	0.15	0.18	0.18	0.16	0.18	0.19	0.18	0.17	0.17	0.19	0.19	0.19	0.18	0.23	0.17	0.18	0.19
LOI	%		FUS-ICP	0.2	0.05	0.14	0.06	0.17	0.45	0.13	0.7	0.1	0.18	0.21	0.37	0.54	0.34	0.102599	0.25	0.21	0.21	0.2	0.04	0.26	0.16	0.18	0.12	0.13	0.25	-0.22	0.17	0.08	0.31	0.21	0.18	0.92	0.9	0.91	0.76	0.67	1.01	1.2	0.92	0.73	0.7
Total	%	0.01	FUS-ICP	98.86	99.73	99.29	100.3	99.49	98.82	99.83	100.5	99.56	100.4	100.3	100.9	100.7	100.7	99.38	99.87	100.9	100.4	101	98.72	100.6	99.54	100.2	100.4	99.56	100	100.2	100.7	100.8	100.8	100.6	100.5	98.82	99.03	99.08	99.25	100.5	100.8	100.4	100.3	100.9	100.8
Be	ppm	1	FUS-ICP	2	2	2	2	2	2	2	2	2	2	2	2	2	2	n.a.	2	2	2	2	2	2	2	2	2	2	2	2	2	2	2	2	2	2	2	2	2	2	2	1	1	2	1
Sc	ppm	0.01	INAA	12.8	12.9	13.1	13.1	13.3	12.6	13.4	13.2	12.9	12.7	12.9	12.6	12.9	12.7	12.531	12.9	13.2	13	13.1	12.6	13.4	12.7	13.2	13	12	11.9	12.8	12.4	13	12.2	12.2	12.3	12.9	12.9	13.1	13	13.3	12.9	13	13.3	13.4	13.4
V	ppm	5	FUS-ICP	104	104	104	105	112	98	105	104	104	103	112	104	103	104	110.385	104	105	113	106	99	114	105	105	106	102	101	110	99	109	108	106	108	106	107	107	107	109	113	111	109	110	113
Cr	ppm	0.5	INAA	135	136	125	142	145	127	141	125	130	130	128	125	124	109	129.393	130	145	125	137	98.8	136	79.5	75.7	88	95.5	82.8	72.8	81.5	71.4	81.6	82.7	82.2	84.9	95	88.1	80.4	80.1	87.7	77	79.3	86.5	84.6
Co	ppm	0.1	INAA	16.3	16.8	17.8	17.7	18.1	16.8	16.7	18.9	15.8	16.3	17.7	19	17.4	16.3	n.a.	18.3	18.2	17.4	18.1	14.3	18.2	14	14	14.3	15.2	14.4	14.6	14.7	14.3	13.4	12.3	14.1	12.5	14.2	14.6	13.6	15.4	13.2	13.4	13.9	13.4	13
Ni	ppm	1	TD-ICP	49	44	51	44	56	43	44	53	48	51	52	53	52	44	48.708	46	51	54	56	29	52	27	27	29	34	29	29	31	29	28	29	27	27	26	27	23	24	27	25	27	24	28
Cu	ppm	1	TD-ICP	24	18	30	32	20	133	25	19	16	22	20	15	19	21	15.147	16	15	16	19	75	16	13	18	32	12	16	7	12	12	9	18	11	14	12	13	11	11	21	13	12	11	13
Zn	ppm	1	MI/TD-ICP	138	134	71	383	67	2080	288	70	116	131	69	68	69	137	71.973	68	69	70	70	1090	68	127	159	430	71	70	73	70	75	72	77	72	83	83	101	101	97	94	84	86	83	85
Ga	ppm	1	FUS-MS	20	19	19	19	20	19	18	19	20	18	20	21	21	20	18.711	21	20	20	20	20	20	20	18	20	20	19	20	20	20	20	20	20	20	18	17	19	20	20	20	19	20	20
Ge	ppm	0.5	FUS-MS	1.3	1.2	2.7	1.2	1.4	1.1	1.2	2.4	1.2	1.2	1.3	1.3	1.3	1.2	n.a.	1.3	1.4	1.3	1.3	1.4	1.3	1.4	1.1	1.3	1.3	2.6	1.5	2.4	1.4	1.4	1.4	1.4	1.2	1	1	1.3	1.1	1.2	1.2	1.3	1.2	1.3
Rb	ppm	1	FUS-MS	50	52	49	50	47	55	46	49	50	45	49	49	50	49	46.4239	50	49	48	49	53	50	50	43	49	51	50	49	52	48	51	51	51	45	40	38	44	46	45	44	44	45	45
Sr	ppm	2	FUS-ICP	452	462	468	475	469	437	460	474	451	471	480	492	481	469	452.185	463	441	476	476	423	449	430	446	439	426	417	421	429	421	435	421	423	433	430	435	430	445	436	415	415	420	413
Y	ppm	1	FUS-ICP	21	20	20	22	24	21	20	22	21	22	22	21	22	21	19.1569	23	20	22	23	22	22	22	22	23	21	25	23	20	23	23	23	22	22	22	22	21	22	22	20	20	21	20
Zr	ppm	1	FUS-ICP	173	181	202	192	163	181	175	202	178	182	166	160	161	174	167.467	160	153	162	158	168	160	170	171	168	153	183	152	185	150	150	153	153	162	163	164	164	165	145	143	143	144	143
Nb	ppm	0.2	FUS-MS	5.3	6.5	13.8	7.6	6.6	8	5.5	14.8	5.7	6.5	5.7	7.2	6.5	5.7	6.68704	7.4	4.4	5.5	5.5	5.4	4.6	5.1	4.5	5	2.8	9.8	3.5	10	3	3.6	3.3	3.6	4.6	4.3	3.9	4.5	4.6	4.5	4.7	4.6	4.7	4.7
Cs	ppm	0.1	FUS-MS	2.6	2.6	2.2	2.5	2.2	2.8	2.3	2.6	2.5	2.3	2.3	2.3	2.4	2.5	2.57705	2.3	2.3	2.3	2.3	1.8	2.4	2.6	2.2	2.4	2.4	2.6	1.9	2.9	2.3	2.4	2.4	2.4	2.2	2.1	1.9	2.2	2.3	2.2	2.2	2.2	2.2	2.3
Ba	ppm	1	FUS-ICP	467	463	433	459	418	435	464	431	469	445	422	413	420	463	437.061	418	426	424	418	460	441	460	457	446	436	453	432	446	430	448	442	440	415	415	422	423	432	405	387	388	393	391
La	ppm	0.05	FUS-MS	17.5	17.8	30	18.4	23.3	18.8	16	27.7	17.9	17	21	25.2	23.6	16.6	17.5177	23.1	20.6	21.3	22.8	16.8	20.3	16.1	14.6	15.8	17.4	18.9	18.6	19.8	17.8	21	17.9	18.5	15.2	14.2	13.1	15	15.8	15.3	15.1	15.3	43.9	15.6
Ce	ppm	0.05	FUS-MS	37.7	38.1	62.6	39.1	48.2	39.7	33.4	57	37.7	36.3	44.9	52.9	49.4	35.6	37.3616	48.5	43.6	45.7	48.3	35.8	43.2	34.7	30.8	33.9	37	39.7	39.5	41.3	37.5	43.9	38.3	38.9	32.6	30.5	28.1	32.5	33.3	32.8	32.4	33.4	60.8	33.1
Pr	ppm	0.01	FUS-MS	4.73	4.67	7.48	4.93	5.88	4.86	4.22	7.04	4.73	4.63	5.47	6.39	5.98	4.46	4.87273	5.88	5.3	5.46	5.85	4.43	5.31	4.26	3.84	4.33	4.59	4.95	4.86	5.11	4.6	5.35	4.68	4.81	3.99	3.76	3.42	4.12	4.14	4.11	4.02	4.13	4.16	4.1
Nd	ppm	0.05	FUS-MS	19.8	18.9	28.5	19.8	23.4	21	17.2	27.2	20.1	19.4	22.4	25.6	24.1	18.3	20.0526	24	21.6	22.6	24.4	18.1	21.8	18	16.3	18	18.8	19.8	20	20.6	19.5	22.1	19.1	19.7	17.1	15.4	15.2	17.2	17.6	17.1	16.5	17.7	17.3	17.7
Sm	ppm	0.01	FUS-MS	4.4	4.44	5.64	4.67	4.82	4.79	3.87	5.42	4.54	4.09	4.93	5.12	4.8	4	4.58694	4.99	4.76	4.72	4.89	4.47	4.67	4.4	3.88	4.02	4.19	4.22	4.2	4.47	4.31	4.56	4.37	4.46	4.11	3.67	3.54	4.02	4.18	3.95	4.03	4.17	4.05	4.04
Eu	ppm	0.005	FUS-MS	1.29	1.27	1.65	1.39	1.41	1.34	1.15	1.55	1.28	1.32	1.33	1.46	1.44	1.26	1.36365	1.37	1.32	1.36	1.38	1.23	1.33	1.24	1.16	1.22	1.16	1.21	1.27	1.33	1.21	1.27	1.19	1.26	1.17	1.04	0.962	1.15	1.18	1.16	1.18	1.17	1.19	1.15
Gd	ppm	0.1	FUS-MS	4.05	4.11	4.64	4.34	4.33	4.35	3.82	4.42	4.01	3.85	4.17	4.53	4.43	3.9	4.23215	4.17	4.01	4.19	4.28	4.19	4.06	4.09	3.69	4.28	3.8	4	3.91	3.77	4.05	4.01	4.07	4.08	3.86	3.67	3.47	3.91	4.24	3.93	4.01	4.06	3.9	3.85
Tb	ppm	0.01	FUS-MS	0.62	0.64	0.74	0.65	0.67	0.62	0.57	0.73	0.65	0.6	0.65	0.68	0.67	0.6	0.670044	0.67	0.63	0.64	0.66	0.62	0.63	0.64	0.55	0.64	0.61	0.66	0.65	0.63	0.66	0.67	0.67	0.65	0.61	0.6	0.55	0.6	0.65	0.62	0.62	0.64	0.65	0.63
Dy	ppm	0.01	FUS-MS	3.55	3.54	4.11	3.66	3.69	3.61	3.25	3.82	3.47	3.39	3.82	3.9	3.86	3.51	3.89338	3.89	3.73	3.69	3.83	3.68	3.72	3.66	3.16	3.61	3.61	3.78	3.85	3.68	3.88	3.77	3.92	3.81	3.5	3.24	3.06	3.59	3.73	3.63	3.54	3.71	3.65	3.76
Ho	ppm	0.01	FUS-MS	0.67	0.69	0.75	0.69	0.72	0.69	0.63	0.74	0.67	0.65	0.72	0.73	0.73	0.65	0.763573	0.71	0.72	0.69	0.72	0.73	0.7	0.71	0.65	0.7	0.71	0.7	0.78	0.72	0.71	0.71	0.74	0.74	0.7	0.66	0.61	0.71	0.73	0.71	0.69	0.7	0.72	0.71
Er	ppm	0.01	FUS-MS	1.88	2	2.04	1.95	2.05	1.91	1.78	2.14	1.96	1.87	2.05	2.08	2.13	1.86	2.07231	2.09	1.99	2.06	2.04	2.03	2.06	2.02	1.89	2.06	2.02	1.97	2.11	2.04	2.18	2.13	2.15	2.12	1.98	1.87	1.84	1.95	1.99	2.06	1.94	2.13	2	2.03
Tm	ppm	0.005	FUS-MS	0.278	0.299	0.291	0.291	0.298	0.276	0.259	0.301	0.278	0.265	0.297	0.305	0.295	0.272	0.298078	0.308	0.295	0.289	0.312	0.307	0.286	0.3	0.281	0.308	0.295	0.315	0.321	0.303	0.313	0.313	0.327	0.321	0.308	0.281	0.257	0.285	0.3	0.308	0.305	0.31	0.297	0.311
Yb	ppm	0.01	FUS-MS	1.78	1.95	1.89	1.91	1.94	1.8	1.64	1.96	1.84	1.68	1.98	1.97	1.87	1.77	1.79977	1.92	1.88	1.95	1.97	1.91	1.83	1.99	1.77	1.96	2	1.96	2.08	2.05	2.02	2.03	2.07	2.13	1.99	1.89	1.67	1.87	2.04	2.02	2.04	1.94	2.07	2.03
Lu	ppm	0.002	FUS-MS	0.271	0.289	0.309	0.295	0.315	0.274	0.254	0.313	0.289	0.266	0.306	0.299	0.321	0.27	0.289772	0.298	0.301	0.297	0.3	0.297	0.298	0.316	0.261	0.306	0.313	0.317	0.329	0.334	0.33	0.324	0.318	0.322	0.319	0.3	0.282	0.296	0.328	0.304	0.306	0.315	0.31	0.319
Hf	ppm	0.1	FUS-MS	3.8	3.8	4.1	4	4	4.1	3.5	4.2	3.9	3.9	4.1	4.2	4.2	3.8	4.51139	3.9	4	4.1	4	4.1	4	4	3.5	3.7	4	4	3.9	4.1	3.9	3.8	4.1	4	3.7	3.6	3.2	3.6	3.7	3.7	3.6	3.8	3.6	3.7
Ta	ppm	0.01	FUS-MS	0.44	0.55	0.48	0.61	0.31	0.62	0.46	0.49	0.47	0.49	0.29	0.32	0.28	0.45	0.522584	0.37	0.23	0.27	0.29	0.44	0.22	0.4	0.35	0.4	0.13	0.37	0.16	0.34	0.16	0.16	0.19	0.18	0.37	0.35	0.3	0.34	0.39	0.35	0.37	0.41	0.36	0.38
Tl	ppm	0.05	FUS-MS	0.27	0.22	0.23	0.26	< 0.05	0.37	0.44	0.26	0.25	0.22	< 0.05	< 0.05	< 0.05	0.23	n.a.	< 0.05	< 0.05	< 0.05	< 0.05	0.31	< 0.05	0.27	0.28	0.29	< 0.05	0.29	< 0.05	0.26	< 0.05	< 0.05	< 0.05	< 0.05	0.28	0.22	0.2	0.25	0.28	0.3	0.29	0.28	0.27	0.26
Pb	ppm	5	TD-ICP	109	100	< 5	543	< 5	3610	382	< 5	89	121	< 5	< 5	< 5	105	7.95271	< 5	5	< 5	< 5	1870	5	88	159	690	< 5	< 5	6	6	5	< 5	5	5	29	23	48	60	41	43	28	31	22	28
Th	ppm	0.05	FUS-MS	4.52	4.63	6.88	4.45	5.35	4.69	4.1	6.2	4.5	4.19	5.12	6.11	5.55	4.28	4.73791	5.7	5.1	5.18	5.39	4.57	5.04	4.38	3.87	4.23	4.81	4.93	4.87	5.08	4.72	5.37	4.87	4.96	3.96	3.74	3.49	3.99	4.16	3.99	4.03	4.07	4.14	4.07
U	ppm	0.01	FUS-MS	1.65	1.65	1.71	1.7	1.67	1.98	1.51	1.74	1.67	1.47	1.69	1.7	1.71	1.56	1.60863	1.72	1.7	1.71	1.68	1.81	1.68	1.49	1.35	1.52	1.76	1.72	1.61	1.79	1.61	1.72	1.69	1.71	1.39	1.27	1.2	1.33	1.36	1.42	1.41	1.41	1.4	1.41
asl = above see level, LOI = loss on ignition, INAA = Instrumental Neutron Activation Analysis, FUS-ICP = Fusion-Inductively Coupled Plasma, TD-ICP = Total Digestion-Inductively Coupled Plasma.
Further details of analytical procedures are described in the Actlabs website at www.actlabs.com
